# Supplementary material for: Effectiveness and safety of a model predictive control (MPC) algorithm for an artificial pancreas system in outpatients with type 1 diabetes (T1D): systematic review and meta-analysis
Source: PubMed Central journal article supplement (PMC9733359; doi:10.1186/s13098-022-00962-2), 2022-12-09
Supplement: 13098_2022_962_MOESM1_ESM.pdf [file 13098_2022_962_MOESM1_ESM.pdf]

## Supplemental material

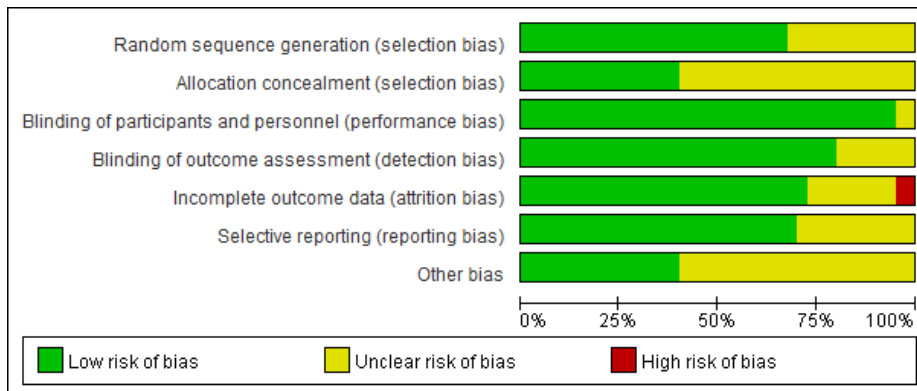

Supplementary Fig. 1 Risk of bias graph.

|                    | Random sequence generation (selection bias) | Allocation concealment (selection bias) | Blinding of participants and personnel (performance bias) | Blinding of outcome assessment (detection bias) | Incomplete outcome data (attrition bias) | Selective reporting (reporting bias) | Other bias |
|--------------------|---------------------------------------------|-----------------------------------------|-----------------------------------------------------------|-------------------------------------------------|------------------------------------------|--------------------------------------|------------|
| Anderson et al     | +                                           | ?                                       | +                                                         | +                                               | +                                        | +                                    | ?          |
| Bally et al        | +                                           | +                                       | +                                                         | +                                               | +                                        | +                                    | +          |
| Benhamou et al     | +                                           | +                                       | +                                                         | +                                               | ?                                        | +                                    | ?          |
| Blaauw et al       | ?                                           | ?                                       | +                                                         | ?                                               | ?                                        | ?                                    | ?          |
| Breton et al       | +                                           | ?                                       | +                                                         | +                                               | ?                                        | ?                                    | ?          |
| Breton et al 2     | ?                                           | ?                                       | +                                                         | +                                               | +                                        | ?                                    | +          |
| Brown et al        | +                                           | +                                       | +                                                         | +                                               | ?                                        | ?                                    | ?          |
| Brown et al 2      | +                                           | ?                                       | +                                                         | ?                                               | +                                        | +                                    | ?          |
| Brown et al 3      | +                                           | ?                                       | +                                                         | +                                               | +                                        | +                                    | ?          |
| Chernawsky et al   | ?                                           | ?                                       | +                                                         | +                                               | +                                        | ?                                    | ?          |
| De bock et al      | +                                           | ?                                       | +                                                         | +                                               | +                                        | +                                    | ?          |
| De boer et al      | +                                           | ?                                       | +                                                         | ?                                               | +                                        | ?                                    | ?          |
| Del Favero et al   | ?                                           | ?                                       | +                                                         | +                                               | +                                        | +                                    | ?          |
| El-Khatib et al    | +                                           | +                                       | +                                                         | +                                               | +                                        | +                                    | +          |
| Elleri et al       | ?                                           | ?                                       | +                                                         | ?                                               | +                                        | +                                    | ?          |
| Forlenza et al     | +                                           | ?                                       | +                                                         | ?                                               | +                                        | ?                                    | ?          |
| Forlenza et al 2   | +                                           | +                                       | +                                                         | +                                               | +                                        | +                                    | +          |
| Haidar et al       | +                                           | +                                       | +                                                         | +                                               | +                                        | +                                    | +          |
| Hovorka et al      | +                                           | +                                       | +                                                         | +                                               | +                                        | +                                    | +          |
| Huyett et al       | ?                                           | ?                                       | ?                                                         | ?                                               | +                                        | ?                                    | ?          |
| Kovatchev et al    | +                                           | +                                       | +                                                         | +                                               | +                                        | +                                    | +          |
| Kovatchev et al 2  | +                                           | ?                                       | +                                                         | +                                               | +                                        | +                                    | ?          |
| Kovatchev et al 3  | +                                           | ?                                       | +                                                         | +                                               | +                                        | +                                    | +          |
| Kropff et al       | +                                           | +                                       | +                                                         | +                                               | ?                                        | +                                    | ?          |
| Leelarathna et al  | +                                           | +                                       | +                                                         | +                                               | +                                        | +                                    | +          |
| Ly et al           | ?                                           | ?                                       | +                                                         | +                                               | ?                                        | ?                                    | ?          |
| Ly et al 2         | ?                                           | ?                                       | +                                                         | ?                                               | +                                        | +                                    | +          |
| Ly et al 3         | ?                                           | ?                                       | +                                                         | +                                               | +                                        | ?                                    | ?          |
| Nimri et al        | +                                           | ?                                       | +                                                         | +                                               | ?                                        | ?                                    | ?          |
| Nimri et al 2      | +                                           | ?                                       | +                                                         | +                                               | +                                        | ?                                    | ?          |
| Renard et al       | ?                                           | ?                                       | +                                                         | +                                               | ?                                        | +                                    | ?          |
| Russell et al      | ?                                           | ?                                       | +                                                         | +                                               | +                                        | +                                    | ?          |
| Russell et al 2    | ?                                           | ?                                       | +                                                         | +                                               | ?                                        | +                                    | ?          |
| Sherr et al        | ?                                           | ?                                       | ?                                                         | ?                                               | +                                        | +                                    | ?          |
| Spaic et al        | +                                           | +                                       | +                                                         | +                                               | +                                        | +                                    | +          |
| Tauschmann et al   | +                                           | +                                       | +                                                         | +                                               | +                                        | +                                    | +          |
| Tauschmann et al 2 | +                                           | +                                       | +                                                         | +                                               | +                                        | +                                    | +          |
| Tauschmann et al 3 | +                                           | +                                       | +                                                         | +                                               | +                                        | +                                    | +          |
| Thabit et al       | +                                           | +                                       | +                                                         | +                                               | +                                        | +                                    | +          |
| Thabit et al 2     | +                                           | +                                       | +                                                         | +                                               | +                                        | +                                    | +          |

Supplementary Fig. 2 Risk of bias summary.

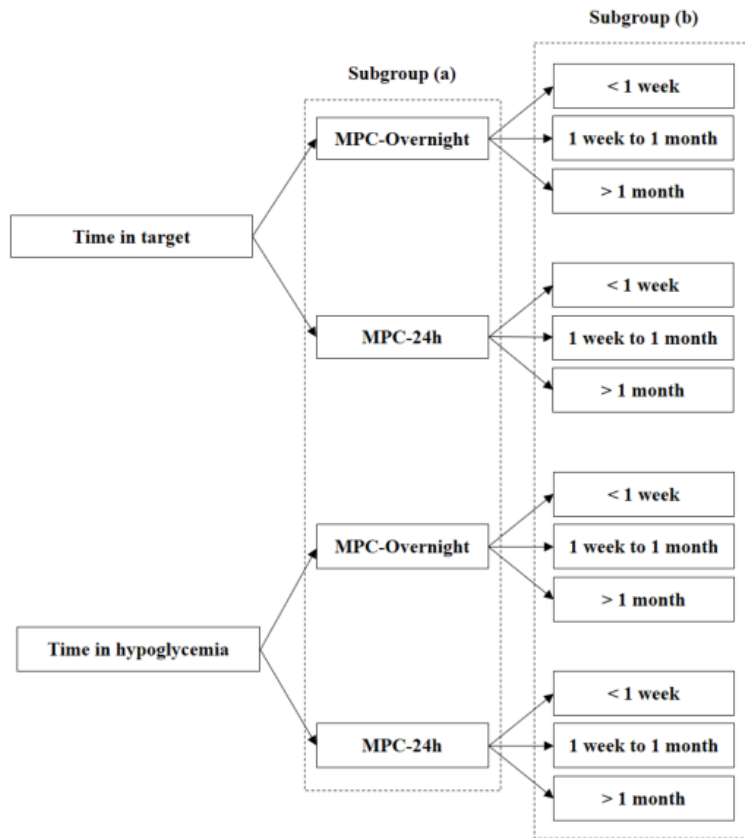

**Supplementary Fig. 3 Subgroup analysis protocol.** (a) intervention duration and (b) follow-up period.

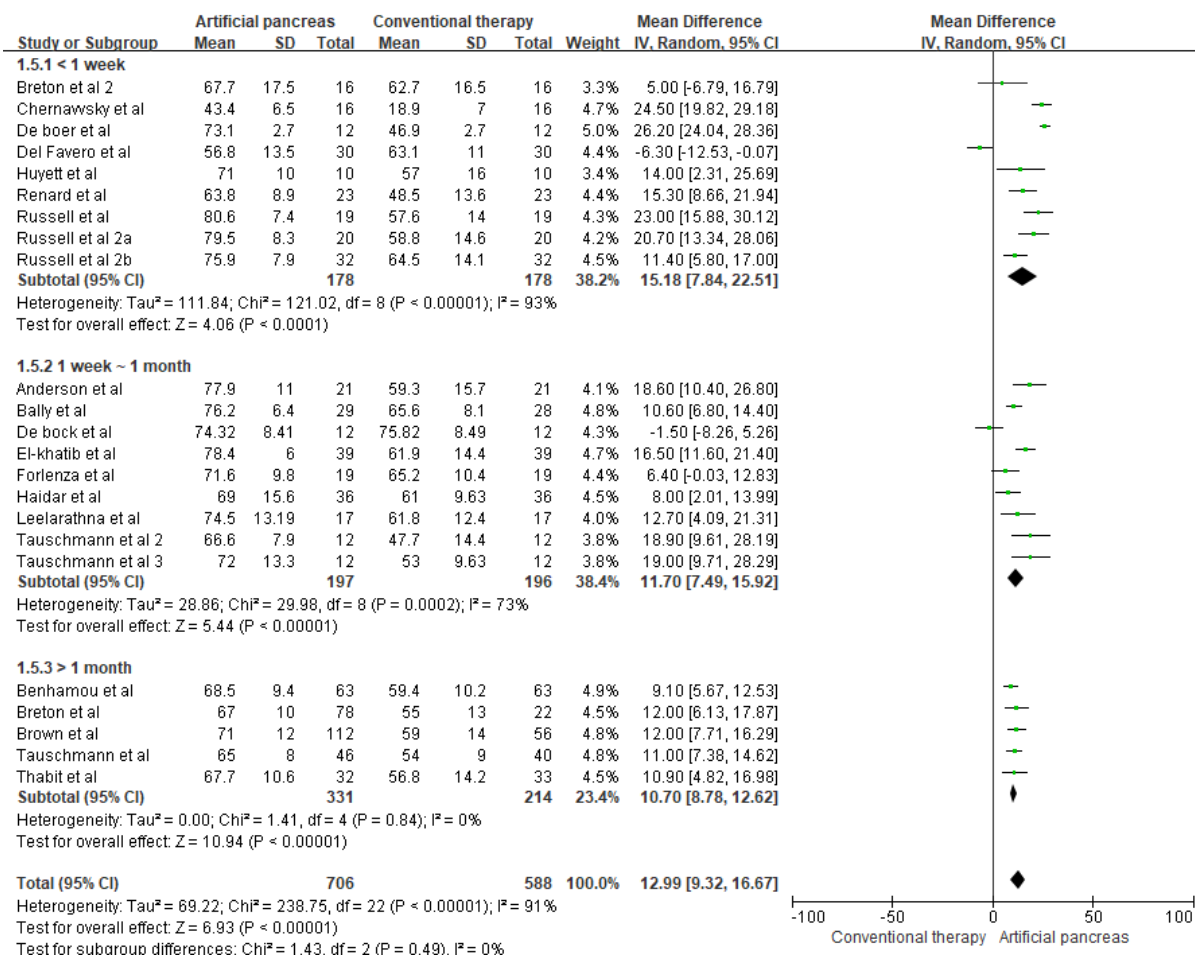

**Supplementary Fig. 4** Mean difference in time maintained in the target blood glucose range according to the follow-up period (artificial pancreas (MPC-24h)).

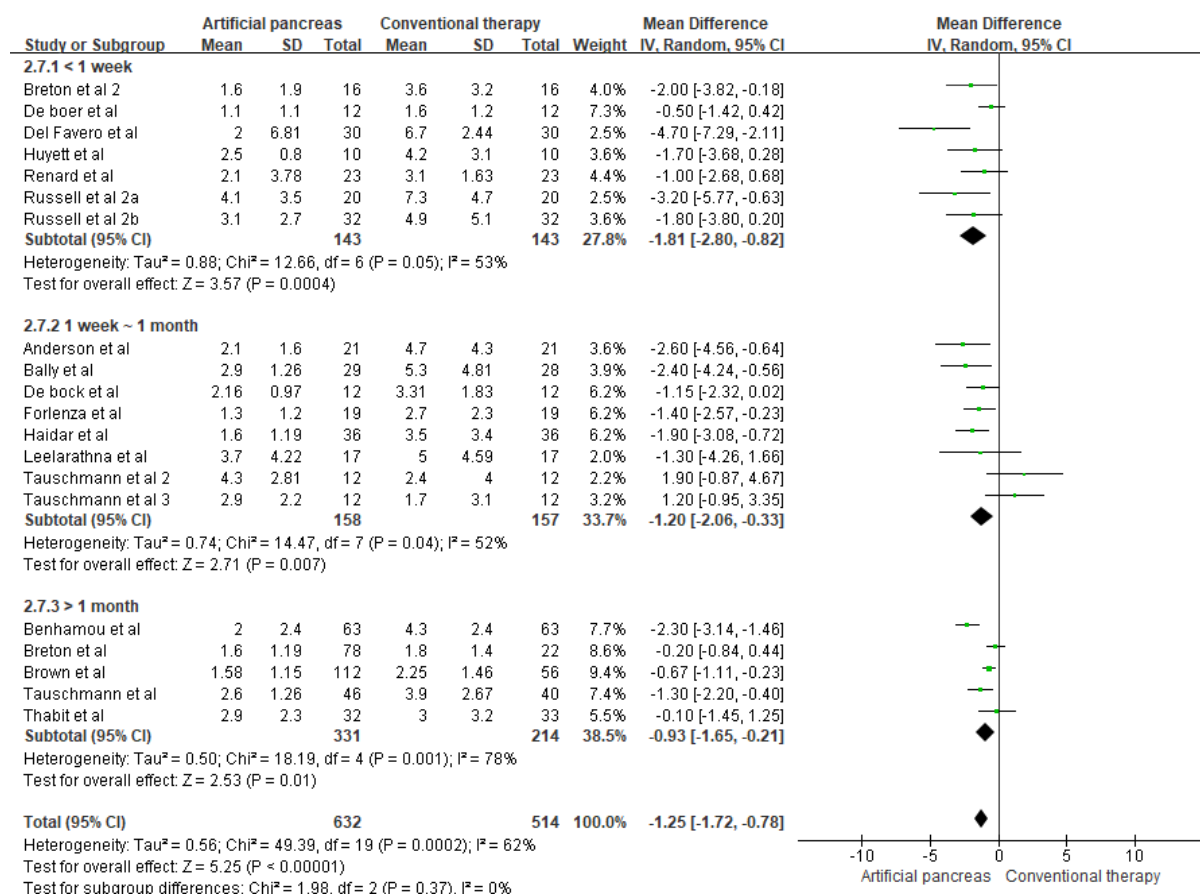

**Supplementary Fig. 5** Mean difference in time maintained in the hypoglycemic range according to the follow-up period (artificial pancreas (MPC-24h)).

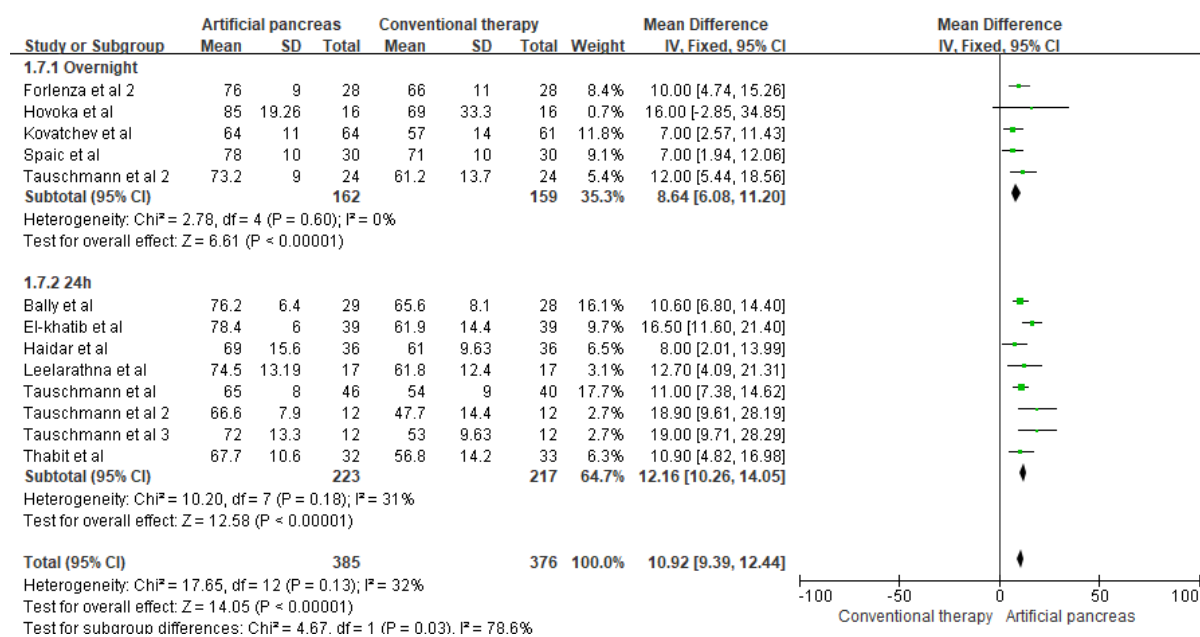

**Supplementary Fig. 6** Sensitivity analysis of only studies with a low risk of bias.

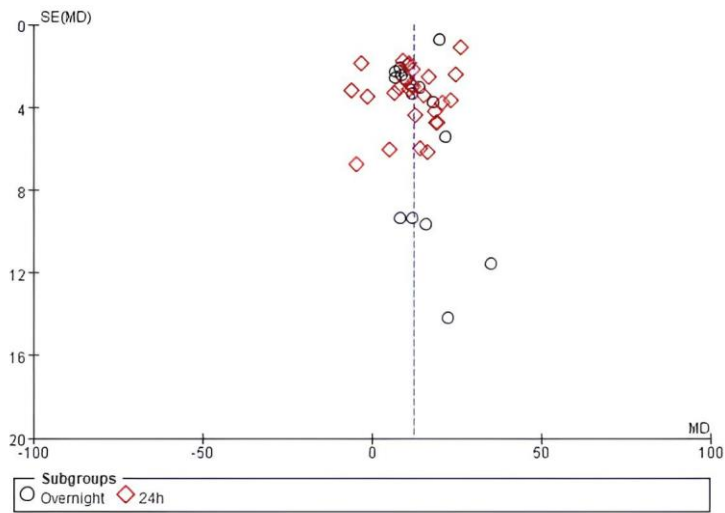

**Supplementary Fig. 7** Funnel plot of studies evaluating the percentage of time maintained in the target blood glucose range (3.9-10mmol).

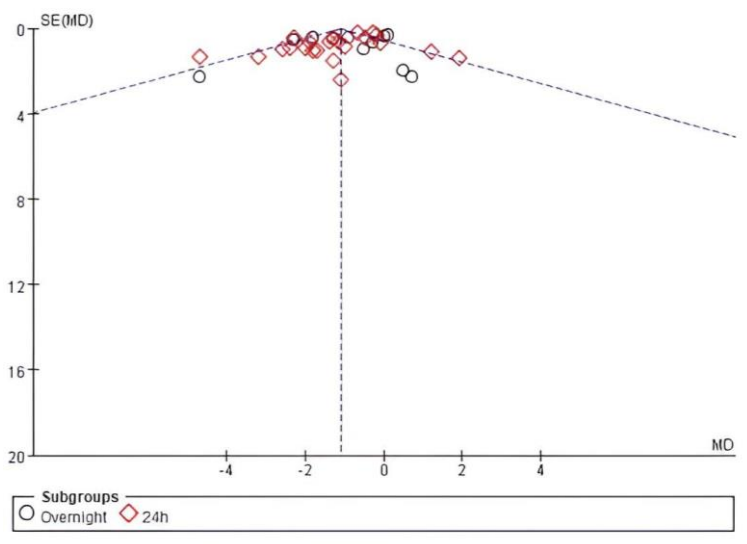

**Supplementary Fig. 8** Funnel plot of studies evaluating the percentage of time maintained in the hypoglycemic range (<3.9mmol).

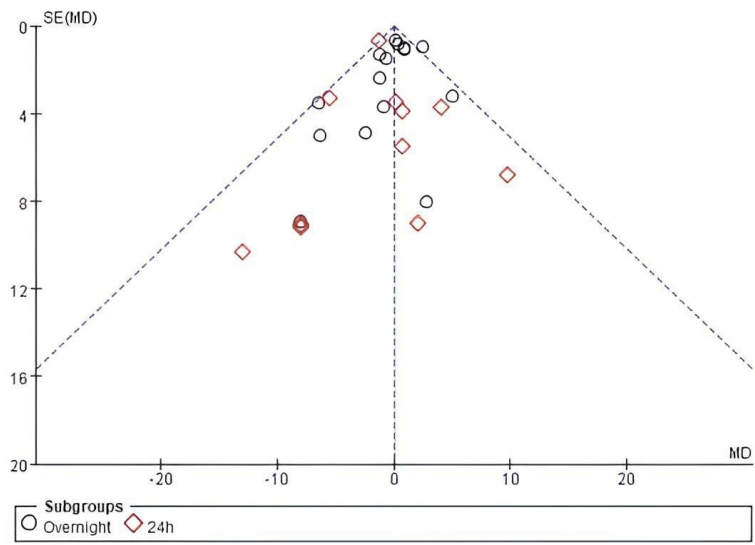

**Supplementary Fig. 9** Funnel plot of studies evaluating the daily insulin dose.

**Supplementary Table 1** PRISMA CheckList 2014.

| Section and Topic             | Item # | Checklist item                                                                                                                                                                                                                                                                                       | Location where item is reported |
|-------------------------------|--------|------------------------------------------------------------------------------------------------------------------------------------------------------------------------------------------------------------------------------------------------------------------------------------------------------|---------------------------------|
| <b>TITLE</b>                  |        |                                                                                                                                                                                                                                                                                                      |                                 |
| Title                         | 1      | Identify the report as a systematic review.                                                                                                                                                                                                                                                          | 1                               |
| <b>ABSTRACT</b>               |        |                                                                                                                                                                                                                                                                                                      |                                 |
| Abstract                      | 2      | See the PRISMA 2020 for Abstracts checklist.                                                                                                                                                                                                                                                         | 1                               |
| <b>INTRODUCTION</b>           |        |                                                                                                                                                                                                                                                                                                      |                                 |
| Rationale                     | 3      | Describe the rationale for the review in the context of existing knowledge.                                                                                                                                                                                                                          | 1-2                             |
| Objectives                    | 4      | Provide an explicit statement of the objective(s) or question(s) the review addresses.                                                                                                                                                                                                               | 1-2                             |
| <b>METHODS</b>                |        |                                                                                                                                                                                                                                                                                                      |                                 |
| Eligibility criteria          | 5      | Specify the inclusion and exclusion criteria for the review and how studies were grouped for the syntheses.                                                                                                                                                                                          | 2                               |
| Information sources           | 6      | Specify all databases, registers, websites, organisations, reference lists and other sources searched or consulted to identify studies. Specify the date when each source was last searched or consulted.                                                                                            | 2                               |
| Search strategy               | 7      | Present the full search strategies for all databases, registers and websites, including any filters and limits used.                                                                                                                                                                                 | 2                               |
| Selection process             | 8      | Specify the methods used to decide whether a study met the inclusion criteria of the review, including how many reviewers screened each record and each report retrieved, whether they worked independently, and if applicable, details of automation tools used in the process.                     | 2                               |
| Data collection process       | 9      | Specify the methods used to collect data from reports, including how many reviewers collected data from each report, whether they worked independently, any processes for obtaining or confirming data from study investigators, and if applicable, details of automation tools used in the process. | 2                               |
| Data items                    | 10a    | List and define all outcomes for which data were sought. Specify whether all results that were compatible with each outcome domain in each study were sought (e.g. for all measures, time points, analyses), and if not, the methods used to decide which results to collect.                        | 3                               |
|                               | 10b    | List and define all other variables for which data were sought (e.g. participant and intervention characteristics, funding sources). Describe any assumptions made about any missing or unclear information.                                                                                         | 3                               |
| Study risk of bias assessment | 11     | Specify the methods used to assess risk of bias in the included studies, including details of the tool(s) used, how many reviewers assessed each study and whether they worked independently, and if applicable, details of automation tools used in the process.                                    | 3                               |
| Effect measures               | 12     | Specify for each outcome the effect measure(s) (e.g. risk ratio, mean difference) used in the synthesis or presentation of results.                                                                                                                                                                  | 3                               |
| Synthesis methods             | 13a    | Describe the processes used to decide which studies were eligible for each synthesis (e.g. tabulating the study intervention characteristics and comparing against the planned groups for each synthesis (item #5)).                                                                                 | 3                               |



| Section and Topic             | Item # | Checklist item                                                                                                                                                                                                                                                                       | Location where item is reported |
|-------------------------------|--------|--------------------------------------------------------------------------------------------------------------------------------------------------------------------------------------------------------------------------------------------------------------------------------------|---------------------------------|
|                               | 13b    | Describe any methods required to prepare the data for presentation or synthesis, such as handling of missing summary statistics, or data conversions.                                                                                                                                | 3                               |
|                               | 13c    | Describe any methods used to tabulate or visually display results of individual studies and syntheses.                                                                                                                                                                               | 3                               |
|                               | 13d    | Describe any methods used to synthesize results and provide a rationale for the choice(s). If meta-analysis was performed, describe the model(s), method(s) to identify the presence and extent of statistical heterogeneity, and software package(s) used.                          | 3                               |
|                               | 13e    | Describe any methods used to explore possible causes of heterogeneity among study results (e.g. subgroup analysis, meta-regression).                                                                                                                                                 | 3                               |
|                               | 13f    | Describe any sensitivity analyses conducted to assess robustness of the synthesized results.                                                                                                                                                                                         | 5                               |
| Reporting bias assessment     | 14     | Describe any methods used to assess risk of bias due to missing results in a synthesis (arising from reporting biases).                                                                                                                                                              | 3                               |
| Certainty assessment          | 15     | Describe any methods used to assess certainty (or confidence) in the body of evidence for an outcome.                                                                                                                                                                                | 3                               |
| <b>RESULTS</b>                |        |                                                                                                                                                                                                                                                                                      |                                 |
| Study selection               | 16a    | Describe the results of the search and selection process, from the number of records identified in the search to the number of studies included in the review, ideally using a flow diagram.                                                                                         | Fig. 1                          |
|                               | 16b    | Cite studies that might appear to meet the inclusion criteria, but which were excluded, and explain why they were excluded.                                                                                                                                                          | 3                               |
| Study characteristics         | 17     | Cite each included study and present its characteristics.                                                                                                                                                                                                                            | Table 1                         |
| Risk of bias in studies       | 18     | Present assessments of risk of bias for each included study.                                                                                                                                                                                                                         | Supple Fig. 1-2                 |
| Results of individual studies | 19     | For all outcomes, present, for each study: (a) summary statistics for each group (where appropriate) and (b) an effect estimate and its precision (e.g. confidence/credible interval), ideally using structured tables or plots.                                                     | Fig. 2-6                        |
| Results of syntheses          | 20a    | For each synthesis, briefly summarise the characteristics and risk of bias among contributing studies.                                                                                                                                                                               | 3                               |
|                               | 20b    | Present results of all statistical syntheses conducted. If meta-analysis was done, present for each the summary estimate and its precision (e.g. confidence/credible interval) and measures of statistical heterogeneity. If comparing groups, describe the direction of the effect. | 4                               |
|                               | 20c    | Present results of all investigations of possible causes of heterogeneity among study results.                                                                                                                                                                                       | 4-5                             |
|                               | 20d    | Present results of all sensitivity analyses conducted to assess the robustness of the synthesized results.                                                                                                                                                                           | Supple Fig. 4                   |

| Section and Topic                              | Item # | Checklist item                                                                                                                                                                                                                             | Location where item is reported |
|------------------------------------------------|--------|--------------------------------------------------------------------------------------------------------------------------------------------------------------------------------------------------------------------------------------------|---------------------------------|
| Reporting biases                               | 21     | Present assessments of risk of bias due to missing results (arising from reporting biases) for each synthesis assessed.                                                                                                                    | Supple Fig. 1-2                 |
| Certainty of evidence                          | 22     | Present assessments of certainty (or confidence) in the body of evidence for each outcome assessed.                                                                                                                                        | 4                               |
| <b>DISCUSSION</b>                              |        |                                                                                                                                                                                                                                            |                                 |
| Discussion                                     | 23a    | Provide a general interpretation of the results in the context of other evidence.                                                                                                                                                          | 5                               |
|                                                | 23b    | Discuss any limitations of the evidence included in the review.                                                                                                                                                                            | 6                               |
|                                                | 23c    | Discuss any limitations of the review processes used.                                                                                                                                                                                      | 6                               |
|                                                | 23d    | Discuss implications of the results for practice, policy, and future research.                                                                                                                                                             | 6                               |
| <b>OTHER INFORMATION</b>                       |        |                                                                                                                                                                                                                                            |                                 |
| Registration and protocol                      | 24a    | Provide registration information for the review, including register name and registration number, or state that the review was not registered.                                                                                             | NA                              |
|                                                | 24b    | Indicate where the review protocol can be accessed, or state that a protocol was not prepared.                                                                                                                                             | NA                              |
|                                                | 24c    | Describe and explain any amendments to information provided at registration or in the protocol.                                                                                                                                            | NA                              |
| Support                                        | 25     | Describe sources of financial or non-financial support for the review, and the role of the funders or sponsors in the review.                                                                                                              | 6                               |
| Competing interests                            | 26     | Declare any competing interests of review authors.                                                                                                                                                                                         | 6                               |
| Availability of data, code and other materials | 27     | Report which of the following are publicly available and where they can be found: template data collection forms; data extracted from included studies; data used for all analyses; analytic code; any other materials used in the review. | 6-10                            |

**Supplementary Table 2** Detailed characteristics of the included studies.

| No | Study                  | Year | Participants (n) | Participants Characteristics                                                        | Artificial pancreas device components                                           | Artificial pancreas algorithm | Comparator | 24h or overnight | Follow-up | Hormone | Setting                 |
|----|------------------------|------|------------------|-------------------------------------------------------------------------------------|---------------------------------------------------------------------------------|-------------------------------|------------|------------------|-----------|---------|-------------------------|
| 1  | Anderson et al [24].   | 2019 | 42               | Mean age 38 years(3.3), TDD 49 units(4.8), HbA1c 7.2% (0.2; 55mmol/mol)             | DiAs USS with Dexcom                                                            | MPC                           | SAP        | 24h              | 4 weeks   | Single  | Home                    |
| 2  | Bally et al [25].      | 2017 | 29               | Mean age 41 years(13), TDD 0.5 units/kg(0.1), HbA1c 6.9% (0.5; 51.7mmol/mol)        | Florence with FreeStyle Navigator                                               | MPC                           | SAP        | 24h              | 4 weeks   | Single  | Home                    |
| 3  | Benhamou et al [26].   | 2019 | 63               | Mean age 48.2 years (13.4), HbA1c 7.6% (0.9; 59.4mmol/mol)                          | Hybrid closed-loop system                                                       | MPC                           | SAP        | 24h              | 12 weeks  | Single  | Home                    |
| 4  | Blauw et al [27].      | 2016 | 10               | Mean age 41 years (26.5–52.3), HbA1c 7.7% (7.4–8; 60.7 mmol/mol)                    | Inreda Diabetic                                                                 | PID                           | Pump       | 24h              | 4 days    | Dual    | Home                    |
| 5  | Breton et al [28].     | 2020 | 101              | Mean age 11.3 years(6-13), TDD 0.89units/kg(0.24), HbA1c 7.7% (1.1)                 | t:slim X2 insulin pump, Dexcom with Control-IQ Technology                       | MPC                           | SAP        | 24h              | 16 weeks  | Single  | Outpatient              |
| 6  | Breton et al 2 [29].   | 2017 | 32               | Mean age 13.2 years (10-16), TDD 0.9 units/kg (0.18), HbA1c 8.5% (1.5)              | t:AP pump or Roche Accu-Chek Spirit Combo pump, Dexcom with DiAs                | MPC                           | SAP        | 24h              | 120h      | Single  | Camp                    |
| 7  | Brown et al [30].      | 2019 | 168              | Mean age 33 years (16), HbA1c 7.6% (0.8)                                            | t:slim X2 insulin pump with Control-IQ Technology, Tandem Diabetes Care, Dexcom | MPC                           | SAP        | 24h              | 6 months  | Single  | Home                    |
| 8  | Brown et al 2 [31].    | 2017 | 40               | Mean age 45.5 years (21-65), TDD 0.4units/kg(0.11), HbA1c 7.4% (0.8)                | DiAs USS with Dexcom                                                            | MPC                           | SAP        | Overnight        | 5 days    | Single  | Research house or hotel |
| 9  | Brown et al 3 [32].    | 2015 | 10               | Mean age 46.8 years (8.5), TDD 0.4 units/kg (0.1), HbA1c 7.01% (1.05; 53.1mmol/mol) | Accu-Chek Spirit Combo pump or personal pump, Dexcom with DiAs system           | PID                           | SAP        | Overnight        | 5 days    | Single  | Research house or hotel |
| 10 | Chernavsky et al [33]. | 2016 | 16               | Mean age 15.2 years (13-17), HbA1c 8.2% (6.9-9.8)                                   | DiAs USS with Dexcom                                                            | MPC                           | Pump       | 24h              | 1 day     | Single  | Research house          |
| 11 | De bock et al [34].    | 2018 | 12               | Mean age 15 years (13-17), HbA1c 8.55%                                              | Medtronic MiniMed Hybrid Closed Loop System                                     | MPC                           | Pump       | 24h              | 7 days    | Single  | Camp                    |

| No | Study                  | Year | Participants (n) | Participants Characteristics                                                                | Artificial pancreas device components                                   | Artificial pancreas algorithm | Comparator | 24h or overnight | Follow-up | Hormone | Setting       |
|----|------------------------|------|------------------|---------------------------------------------------------------------------------------------|-------------------------------------------------------------------------|-------------------------------|------------|------------------|-----------|---------|---------------|
| 12 | De boer et al [35].    | 2017 | 12               | Mean age 7 years (0.37), TDD 0.75 units/kg(0.18), HbA1c 7.7% (0.52)                         | DiAs USS with Dexcom                                                    | MPC                           | SAP        | 24h              | 3 days    | Single  | Hotel or home |
| 13 | Del Favero et al [36]. | 2016 | 30               | Mean age 7.6 years (1.2), TDD 0.78 units/kg (0.16), HbA1c 7.3% (0.9; 56.3 mmol/mol)         | Accu-Chek Spirit Combo pump or personal pump, Dexcom with DiAs system   | MPC                           | SAP        | 24h              | 72h       | Single  | Camp          |
| 14 | El-Khatib et al [37].  | 2017 | 39               | Mean age 33.3 years (11.1), TDD 0.6 units/kg (0.14), HbA1c 7.7% (1.2; 60.7 mmol/mol)        | Two(one for insulin, one for glucagon) t: Slim infusion pumps, Dexcom   | MPC                           | Pump       | 24h              | 11 days   | Dual    | Home          |
| 15 | Elleri et al [38].     | 2013 | 12               | Mean age 15 years (12-18), TDD 0.9 units/kg(0.3), HbA1c 7.9% (0.7)                          | SEVEN PLUS; Dexcom                                                      | MPC                           | Pump       | Overnight        | 36h       | Single  | Outpatient    |
| 16 | Forlenza et al [39].   | 2017 | 19               | Mean age 23 years (10), TDD 0.67 units/kg(0.19), HbA1c 8% (1.7; 63.8mmol/mol)               | DiAs                                                                    | MPC                           | SAP        | 24h              | 2 weeks   | Single  | Home          |
| 17 | Forlenza et al 2 [40]. | 2017 | 28               | Mean age 12 years (6-14), TDD 0.83 units/kg(0.14), HbA1c 7.6% (1.1; 60mmol/mol)             | Medtronic PHHM                                                          | MPC                           | SAP        | Overnight        | 21 nights | Single  | Home          |
| 18 | Haidar et al [20].     | 2021 | 36               | Mean age 39 years(16), TDD 0.65 units/kg (0.22), HbA1c 7.5% (0.8)                           | Dexcom CGM system, t: slim TAP3 insulin pump                            | MPC                           | SAP        | 24h              | 12 days   | Single  | Outpatient    |
| 19 | Hovorka et al [41].    | 2014 | 16               | Mean age 15.6 years (2.1), TDD 0.8 (0.2), HbA1c 8.0% (0.9)                                  | Florence with FreeStyle Navigator                                       | MPC                           | SAP        | Overnight        | 21 days   | Single  | Home          |
| 20 | Huyett et al [42].     | 2017 | 10               | Mean age 15.3 years (11.9-17.7), TDD 0.82 units/kg(0.60-1.14), HbA1c 8.1% (1.3; 65mmol/mol) | DiAs with Dexcom                                                        | MPC                           | SAP        | 24h              | 72h       | Single  | Outpatient    |
| 21 | Kovatchev et al [43].  | 2020 | 125              | Mean age 33 years (14-70), HbA1c 7.4% (0.9; 57mmol/mol)                                     | Accu-Chek Spirit Combo insulin pump, Dexcom CGM system, and inControlAP | MPC                           | SAP        | Overnight        | 3 months  | Single  | Outpatient    |

| No | Study                   | Year | Participants (n) | Participants Characteristics                                                       | Artificial pancreas device components                                   | Artificial pancreas algorithm | Comparator | 24h or overnight | Follow-up | Hormone | Setting             |
|----|-------------------------|------|------------------|------------------------------------------------------------------------------------|-------------------------------------------------------------------------|-------------------------------|------------|------------------|-----------|---------|---------------------|
| 22 | Kovatchev et al 2 [44]. | 2020 | 78               | Mean age 42.3 years (11.9), HbA1c 7.42% (1.03)                                     | Accu-Chek Spirit Combo insulin pump, Dexcom CGM system, and inControlAP | MPC                           | SAP        | Overnight        | 10 months | Single  | Outpatient          |
| 23 | Kovatchev et al 3 [45]. | 2014 | 18               | Mean age 46 years (10), HbA1c 7.4% (0.7; 57.4 mmol/mol)                            | Tandem t:slim pump, with DiAs system                                    | PID                           | SAP        | 24h              | 40h       | Single  | Hotel or guesthouse |
| 24 | Kropff et al [46].      | 2015 | 32               | Mean age 47 years (11.2), TDD 0.6 units/kg (0.1), HbA1c 8.2% (0.6; 66.1 mmol/mol)  | Accu-Chek Spirit Combo insulin pump, Dexcom CGM system                  | MPC                           | SAP        | Overnight        | 12 weeks  | Single  | Home                |
| 25 | Leelarathna et al [47]. | 2014 | 17               | Mean age 34 years (9), TDD 0.53 units/kg (0.12), HbA1c 7.6% (0.8; 59.6 mmol/mol)   | Florence with FreeStyle Navigator                                       | MPC                           | SAP        | 24h              | 8 days    | Single  | Home                |
| 26 | Ly et al [48].          | 2016 | 21               | Mean age 14.7 years (3.9), TDD 0.8 units/kg (0.2), HbA1c 7.9% (1.4; 62.8 mmol/mol) | Medtronic MiniMed Hybrid Closed Loop System                             | PID                           | SAP        | Overnight        | 5-6 days  | Single  | Camp                |
| 27 | Ly et al 2 [49].        | 2015 | 21               | Mean age 18.6 years (3.7), TDD 0.8 units/kg (0.2), HbA1c 8.6% (1.5; 70.5 mmol/mol) | Medtronic MiniMed Hybrid Closed Loop System                             | PID                           | SAP        | 24h              | 6 days    | Single  | Camp                |
| 28 | Ly et al 3 [50].        | 2014 | 20               | Mean age 15.3 years (2.9), HbA1c 8.1% (1.1; 65 mmol/mol)                           | Medtronic MiniMed Hybrid Closed Loop System                             | PID                           | SAP        | Overnight        | 5-6 days  | Single  | Camp                |
| 29 | Nimri et al [51].       | 2014 | 24               | Mean age 21.2 years (8.9), TDD 0.8 units/kg (0.3), HbA1c 8.5% (0.8; 69.4 mmol/mol) | MD-Logic system with Medtronic Paradigm Veo pump                        | Fuzzy                         | SAP        | Overnight        | 6 weeks   | Single  | Home                |
| 30 | Nimri et al 2 [52].     | 2014 | 15               | Mean age 19 years (10.4), TDD 0.9 units/kg (0.3), HbA1c 7.5% (0.5; 58.5 mmol/mol)  | MD-Logic system with Medtronic Paradigm Veo pump                        | Fuzzy                         | SAP        | Overnight        | 4 days    | Single  | Home                |
| 31 | Renard et al [53].      | 2018 | 23               | Mean age 9.4 years (7-12), TDD 0.8 units/kg (0.2), HbA1c 7.5% (0.5; 58 mmol/mol)   | DiAs with Dexcom                                                        | MPC                           | SAP        | 24h              | 2 days    | Single  | Outpatient          |

| No | Study                    | Year | Participants (n) | Participants Characteristics                                                         | Artificial pancreas device components                                 | Artificial pancreas algorithm | Comparator | 24h or overnight | Follow-up | Hormone | Setting       |
|----|--------------------------|------|------------------|--------------------------------------------------------------------------------------|-----------------------------------------------------------------------|-------------------------------|------------|------------------|-----------|---------|---------------|
| 32 | Russell et al [54].      | 2016 | 19               | Mean age 9.8 years (1.6), TDD 0.74 units/kg (0.15), HbA1c 7.8% (0.8; 61.7 mmol/mol)  | Two(one for insulin, one for glucagon) t: Slim infusion pumps, Dexcom | MPC                           | Pump       | 24h              | 5 days    | Dual    | Camp          |
| 33 | Russell et al 2a [55].   | 2014 | 20               | Mean age 40 years (16), TDD 0.5 units/kg (0.11), HbA1c 7.1% (0.8; 4.1 mmol/mol)      | Two(one for insulin, one for glucagon) t: Slim infusion pumps, Dexcom | MPC                           | Pump       | 24h              | 5 days    | Dual    | Home          |
| 34 | Russell et al 2b [55].   | 2014 | 32               | Mean age 16 years (3), TDD 0.8 units/kg (0.18), HbA1c 8.2% (1; 66.1 mmol/mol)        | Two(one for insulin, one for glucagon) t: Slim infusion pumps, Dexcom | MPC                           | Pump       | 24h              | 5 days    | Dual    | Camp          |
| 35 | Sherr et al [56].        | 2020 | 11               | Mean age 28.8 years (7.9), HbA1c 7.4% (1.2)                                          | Omnipod hybrid closed loop system                                     | MPC                           | Pump       | Overnight        | 7 days    | Single  | Hotel or home |
| 36 | Spaic et al [57].        | 2017 | 30               | Mean age 31 years (15-43), TDD 0.58 units/kg (0.16), HbA1c 7.1% (0.59; 54 mmol/mol)  | Medtronic PHHM                                                        | MPC                           | SAP        | Overnight        | 21 nights | Single  | Home          |
| 37 | Tauschmann et al [58].   | 2018 | 86               | Mean age 22 years (13-36), TDD 0.76 units/kg (0.25), HbA1c 8.3% (0.6)                | Medtronic Hybrid Closed Loop System                                   | MPC                           | SAP        | 24h              | 12 weeks  | Single  | Outpatient    |
| 38 | Tauschmann et al 2 [59]. | 2016 | 12               | Mean age 14.6 years (3.1), TDD 0.82 units/kg (0.18), HbA1c 8.5% (0.7; 69.4 mmol/mol) | Florence with FreeStyle Navigator                                     | MPC                           | SAP        | 24h              | 3 weeks   | Single  | Home          |
| 39 | Tauschmann et al 3 [60]. | 2016 | 12               | Mean age 15.4 years (2.6), TDD 0.84 units/kg (0.22), HbA1c 8.3% (0.9; 67.2 mmol/mol) | Florence with FreeStyle Navigator                                     | MPC                           | SAP        | 24h              | 7 days    | Single  | Home          |
| 40 | Thabit et al [61].       | 2015 | 33               | Mean age 40 years (9.4), TDD 0.62 units/kg (0.15), HbA1c 8.5% (0.7; 69.4 mmol/mol)   | Florence with FreeStyle Navigator                                     | MPC                           | SAP        | 24h              | 12 weeks  | Single  | Home          |
| 41 | Thabit et al 2 [62].     | 2014 | 24               | Mean age 43 years (12), TDD 0.5 units/kg (0.1), HbA1c 8.1% (0.8; 65 mmol/mol)        | Florence with FreeStyle Navigator                                     | MPC                           | SAP        | Overnight        | 4 weeks   | Single  | Home          |

MPC = Model Predictive Control, PID = Proportional Integral Derivative, SAP = Sensor-Augmented Pump

TDD = Total Daily Dose, BMI = Body Mass Index, CGM = Continuous Glucose Monitoring, DiAs = Diabetes Assistant

**Supplementary Table 3** Mean difference in time maintained in the target blood glucose range and hypoglycemic range according to the timing of the intervention and algorithm type.

|                                                                              | Number of comparisons | Mean difference (95% CI) | p value  | <i>I</i> <sup>2</sup> |
|------------------------------------------------------------------------------|-----------------------|--------------------------|----------|-----------------------|
| <b>Percentage of time maintained in the target blood glucose range</b>       |                       |                          |          |                       |
| All comparisons                                                              | 41                    | 12.56 (9.80, 15.31)      | <0.00001 | 90%                   |
| Intervention duration                                                        |                       |                          |          |                       |
| Overnight                                                                    | 15                    | 13.04 (9.05, 17.04)      | <0.00001 | 84%                   |
| 24h                                                                          | 26                    | 11.88 (7.99, 15.78)      | <0.00001 | 93%                   |
| Algorithm                                                                    |                       |                          |          |                       |
| MPC vs Conventional therapy                                                  | 33                    | 12.57 (9.63, 15.50)      | <0.00001 | 89%                   |
| PID vs Conventional therapy                                                  | 6                     | 9.59 (-3.67, 22.85)      | <0.00001 | 96%                   |
| Fuzzy vs Conventional therapy                                                | 2                     | 16.52 (9.72, 23.32)      | 0.23     | 29%                   |
| <b>Percentage of time maintained in the hypoglycemic blood glucose range</b> |                       |                          |          |                       |
| All comparisons                                                              | 35                    | -1.62 (-2.43, -0.81)     | <0.00001 | 94%                   |
| Intervention duration                                                        |                       |                          |          |                       |
| Overnight                                                                    | 13                    | -2.39 (-4.61, -0.18)     | <0.00001 | 98%                   |
| 24h                                                                          | 22                    | -1.16 (-1.59, -0.73)     | <0.00001 | 63%                   |
| Algorithm                                                                    |                       |                          |          |                       |
| MPC vs Conventional therapy                                                  | 30                    | -1.12 (-1.50, -0.75)     | <0.00001 | 64%                   |
| PID vs Conventional therapy                                                  | 3                     | -5.24 (-16.06, 5.58)     | <0.00001 | 100%                  |
| Fuzzy vs Conventional therapy                                                | 2                     | -20.80 (-64.12, 22.52)   | 0.0007   | 91%                   |

CI=Confidence Intervals, MPC=Model Predictive Control, PID=Proportional Integral Derivative

**Supplementary Table 4** Mean difference in daily insulin dose(U) according to the intervention duration (overnight and 24h) and algorithm type (MPC, PID, and fuzzy) (artificial pancreas vs conventional insulin therapy).

|                               | Number of comparisons | Mean difference (95% CI)          | P value               | <i>I</i> <sup>2</sup>             |
|-------------------------------|-----------------------|-----------------------------------|-----------------------|-----------------------------------|
| <b>All comparisons</b>        | 26                    | 0.13 (0.02, 0.24)                 | 0.02                  | 26%                               |
|                               |                       | <b>Overnight</b>                  | <b>24h</b>            |                                   |
|                               | Number of comparisons | Mean difference (95% CI; p value) | Number of comparisons | Mean difference (95% CI; p value) |
| MPC vs Conventional therapy   | 7                     | 0.02 (-1.77, 1.82; p=0.98)        | 9                     | -1.24 (-2.43, -0.06; p=0.04)      |
| PID vs Conventional therapy   | 4                     | 0.10 (-1.11, 1.31; p=0.87)        | 2                     | 1.85 (-15.38, 19.08; p=0.83)      |
| Fuzzy vs Conventional therapy | 2                     | -1.19 (-3.46, 1.08; p=0.30)       | -                     | -                                 |

CI=Confidence Intervals, MPC=Model Predictive Control, PID=Proportional Integral Derivative
